# Supplementary material for: Systematic review of the association between dietary acid load, alkaline water and cancer
Source: PubMed Central journal article supplement — BMJ Open. 2016 Jun 13;6(6):e010438. doi: 10.1136/bmjopen-2015-010438 (PMC4916623; doi:10.1136/bmjopen-2015-010438), 2016-06-13
Supplement: bmjopen-2015-010438supp.pdf [file bmjopen-2015-010438supp.pdf]

## Supplementary information file

### Search strategy for PubMed search engine of MedLine

In an attempt to find all published literature on the topic, human studies relating to the acid-ash diet hypothesis and cancer were identified through computerized searches using, but not limited to, the following medical subject headings and textwords in Medline back to 1966 using the PubMed search engine:

1. acid OR alkaline OR acid-ash OR acid-base OR "acid-base equilibrium" OR "acid excretion" OR "net acid excretion" OR "potential renal acid load"
2. diet
3. cancer or neoplasms
4. Not: not "folic acid" not "ascorbic acid" not "fatty acid" not "amino acid"
